# Supplementary material for: The Solomon Sea: its circulation, chemistry, geochemistry and biology explored during two oceanographic cruises
Source: Oxford University Press journal article supplement (doi:10.1525/elementa.221), 2017-01-01
Supplement: elementa-5-221-s13.pdf [file elementa-5-221-s13.pdf]

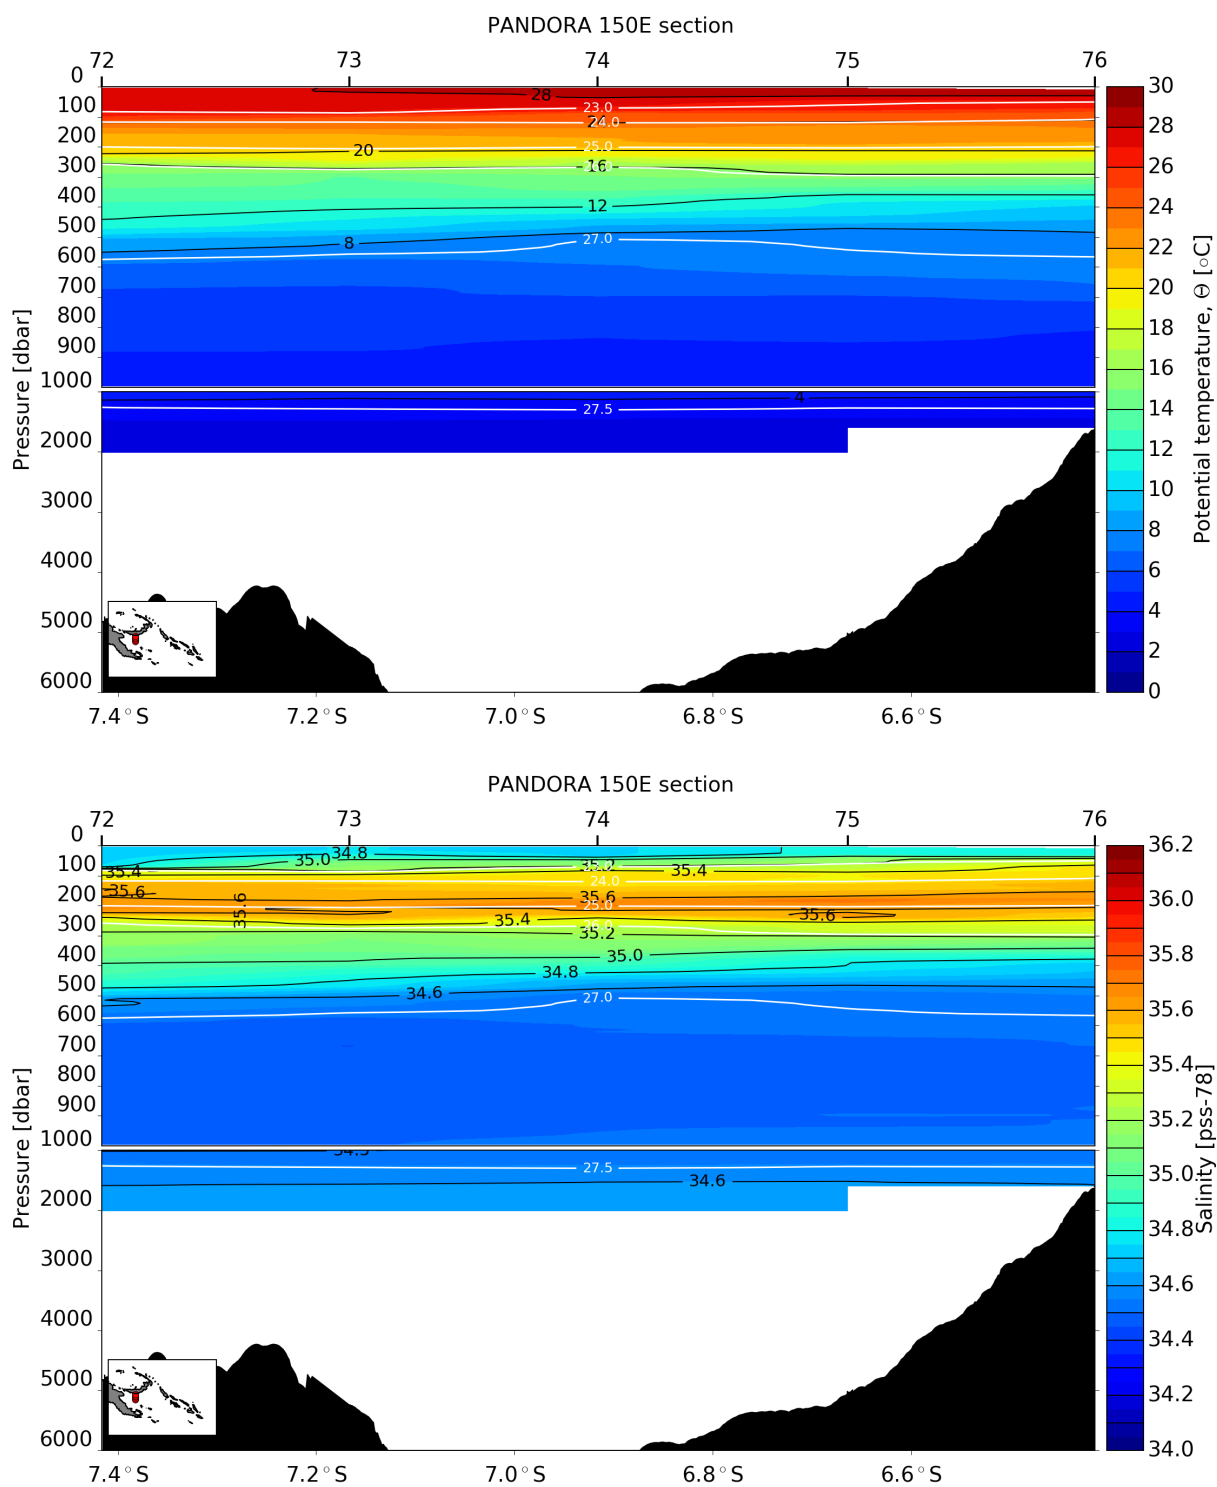

Figure S13: (Upper) potential temperature and (lower) salinity section along 150E

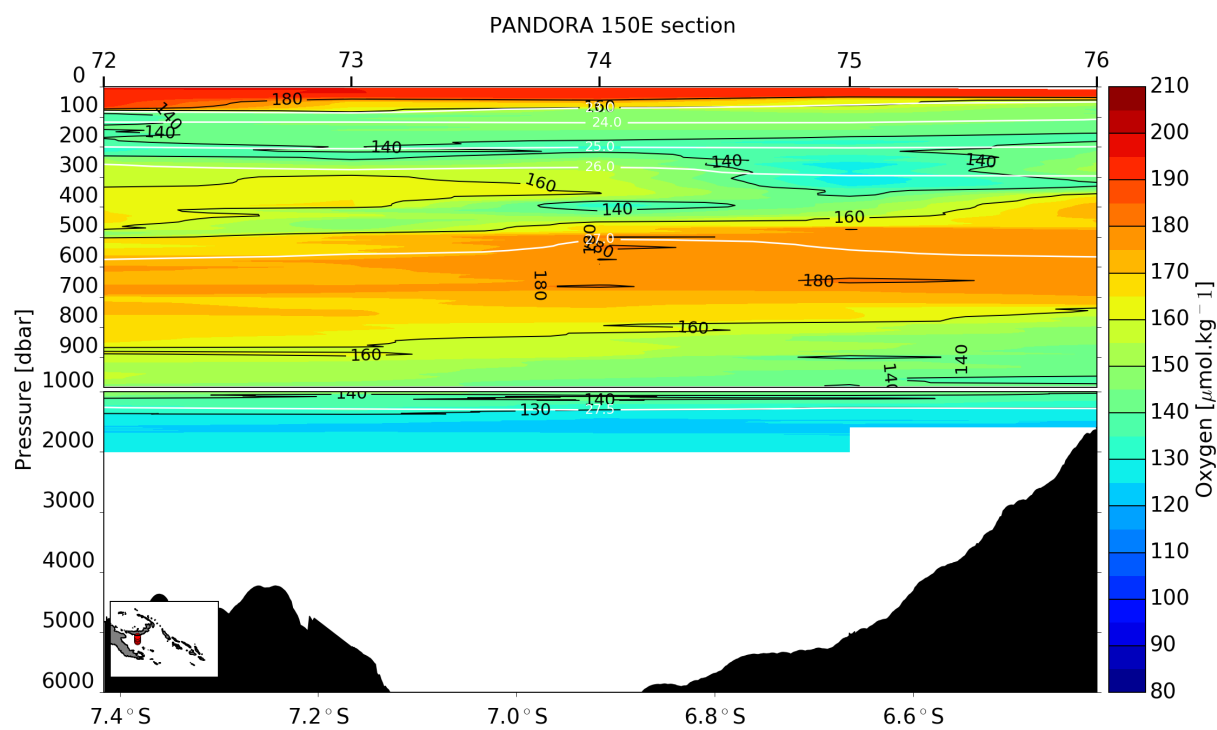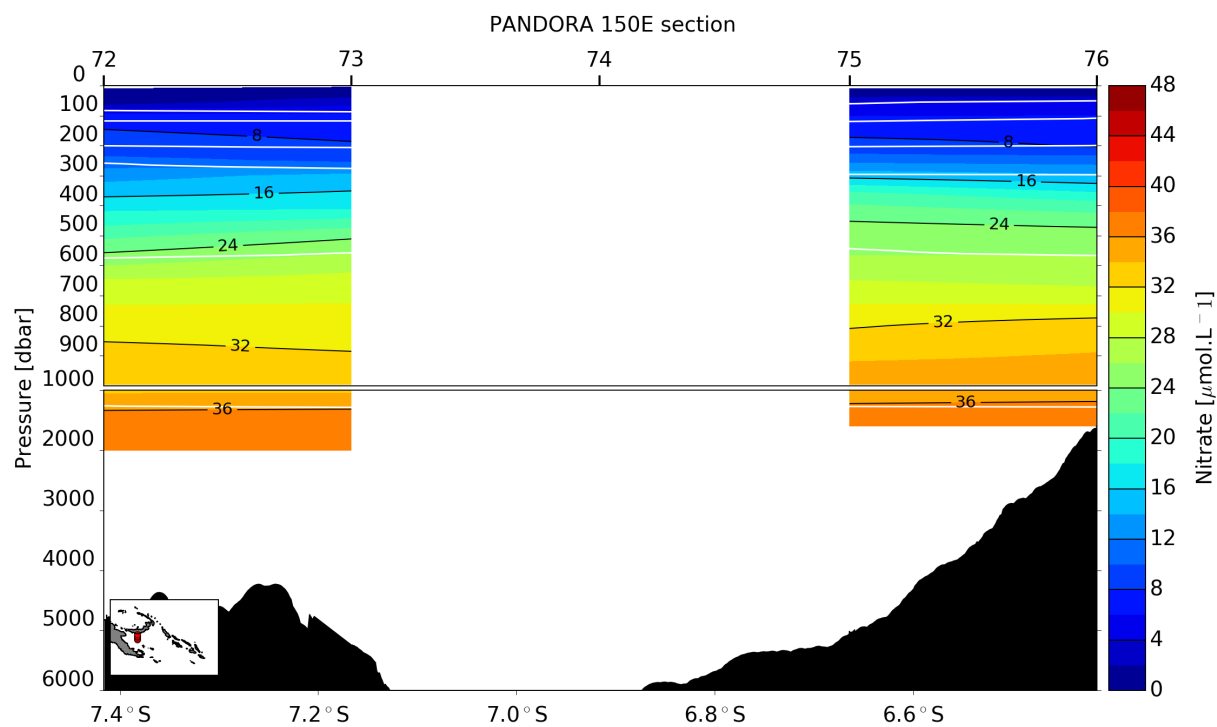

Figure S13: contd; dissolved oxygen and nitrate

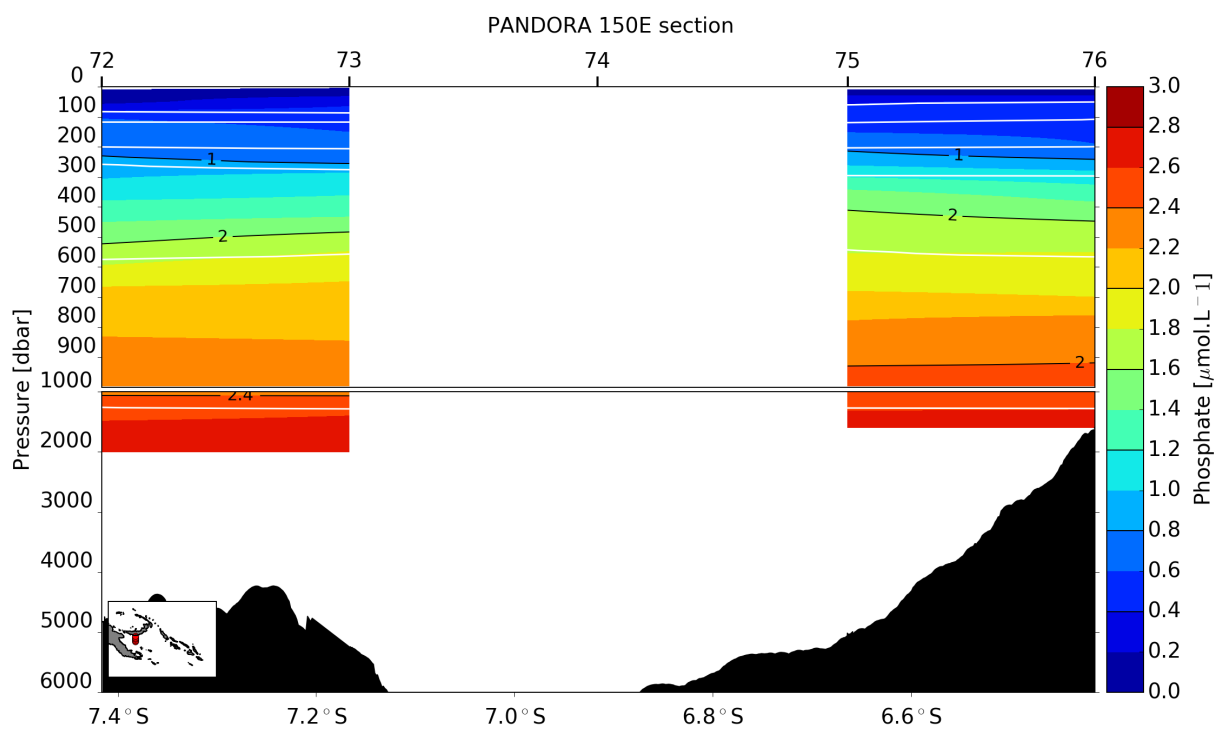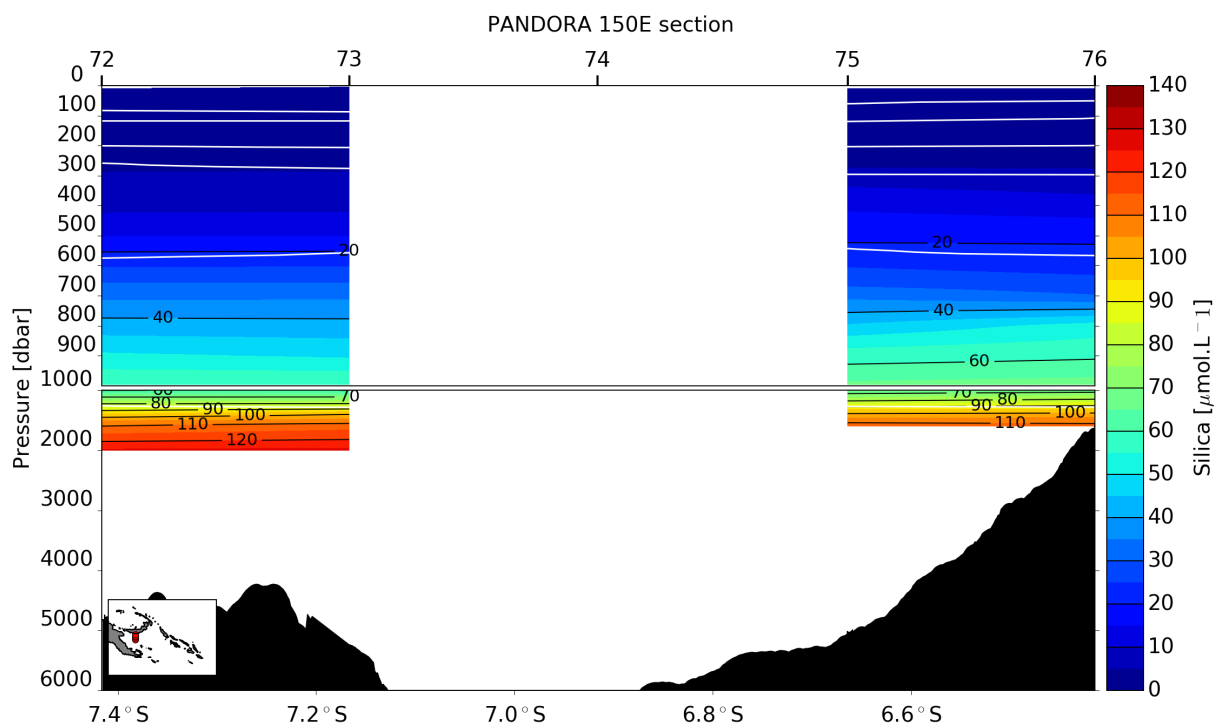

Figure S13: contd; phosphate and silicate
